# Supplementary material for: Internal Validation of the ASFV MONODOSE dtec-qPCR Kit for African Swine Fever Virus Detection under the UNE-EN ISO/IEC 17025:2005 Criteria
Source: MDPI journal article supplement (doi:10.3390/vetsci10090564), 2023-09-08
Supplement: s1 [file s1]

**Table S1.** Diagnostic analysis results (Cts) for African swine fever virus qPCR.

| ID | Sample      | Isolate           | Origin     | Host         | ASFV<br>GPS™-mix | King et al. | Fernández<br>Pinero et al. |
|----|-------------|-------------------|------------|--------------|------------------|-------------|----------------------------|
| 1  | Blood serum | E70               | Spain      | Domestic pig | 29.98            | 32.72       | 31.49                      |
| 2  | Blood serum | BF07 OUAGA 2      | Burkina    | Domestic pig | 32.53            | 34.84       | 35.79                      |
| 3  | Blood serum | SS14/WB-Sassari1  | Italy      | Wild boar    | 31.83            | 33.35       | 32.33                      |
| 4  | Blood serum | SS14/DP-Cagliari1 | Italy      | Domestic pig | 36.18            | Negative    | 36.67                      |
| 5  | Blood serum | Arm07             | Armenia    | Domestic pig | 29.68            | 31.56       | 30.51                      |
| 6  | Blood serum | Ukr12/Zapo        | Ukraine    | Domestic pig | 28.30            | 30.79       | 28.48                      |
| 7  | Blood serum | Ukr15/DP-Kieve 1  | Ukraine    | Domestic pig | 32.43            | 35.57       | 34.28                      |
| 8  | Blood serum | LT14/1490         | Lithuania  | Wild boar    | 29.89            | 32.01       | 27.41                      |
| 9  | Blood serum | Pol14/Krus        | Poland     | Wild boar    | 30.64            | 33.12       | 30.75                      |
| 10 | Blood serum | Lv14/DP/Robez3    | Latvia     | Domestic pig | 33.59            | 35.7        | 35.9                       |
| 11 | Blood serum | Est14/WB-Valga-1  | Estonia    | Wild boar    | 32.58            | 34.85       | 35.22                      |
| 12 | Blood serum | Est15/WB-Tartu14  | Estonia    | Wild boar    | 35.32            | 35.86       | 37.39                      |
| 13 | Blood serum | MOL16/DP-CERNO1   | Moldova    | Domestic pig | 35.71            | Negative    | 32.63                      |
| 14 | Blood serum | MOL16/DP-MOSA1    | Moldova    | Domestic pig | 33.76            | 36          | 34.47                      |
| 15 | Blood serum | Moz64             | Mozambique | Domestic pig | 29.99            | 32.71       | 32.64                      |
| 16 | Blood serum | MwLil 20/1        | Malawi     | Tick         | 33.08            | 35.09       | 35.18                      |
| 17 | Blood serum | Ken11/KisP52      | Kenia      | Domestic pig | 34.76            | 32.67       | 33.65                      |
| 18 | Blood serum | Ken06.Bus         | Kenia      | Domestic pig | 42.53            | Negative    | 39.65                      |
| 19 | Blood serum | Ken08Tk.2/1       | Kenia      | Tick         | 35.54            | 34.22       | 32.46                      |
| 20 | Blood serum | UG10/Tk3.2        | Uganda     | Tick         | 38.88            | 39.4        | 37.96                      |
| 21 | Blood serum | Eth13/1505        | Ethiopia   | Domestic pig | 32.37            | 34.58       | 34.56                      |
| 22 | Blood serum | -                 | Spain      | Domestic pig | Negative         | Negative    | Negative                   |
| 23 | Blood serum | -                 | Spain      | Domestic pig | Negative         | Negative    | Negative                   |
| 24 | Blood serum | -                 | Spain      | Domestic pig | Negative         | Negative    | Negative                   |

[illegible]

|    |             |                   |            |              |          |          |          |
|----|-------------|-------------------|------------|--------------|----------|----------|----------|
| 54 | Blood serum | -                 | Spain      | Domestic pig | Negative | Negative | Negative |
| 55 | Blood serum | -                 | Spain      | Domestic pig | Negative | Negative | Negative |
| 56 | Blood serum | -                 | Spain      | Domestic pig | Negative | Negative | Negative |
| 57 | Blood serum | -                 | Spain      | Domestic pig | Negative | Negative | Negative |
| 58 | Blood serum | -                 | Spain      | Domestic pig | Negative | Negative | Negative |
| 59 | Blood serum | -                 | Spain      | Domestic pig | Negative | Negative | Negative |
| 60 | Blood serum | -                 | Spain      | Domestic pig | Negative | Negative | Negative |
| 61 | Blood serum | -                 | Spain      | Domestic pig | Negative | Negative | Negative |
| 62 | Kidney      | E70               | Spain      | Domestic pig | 28.38    | 31.42    | 31.43    |
| 63 | Kidney      | BF07 OUAGA 2      | Burkina    | Domestic pig | 31.46    | 33.97    | 29.83    |
| 64 | Kidney      | SS14/WB-Sassari1  | Italy      | Wild boar    | 29.81    | 33.53    | 32.6     |
| 65 | Kidney      | SS14/DP-Cagliari1 | Italy      | Domestic pig | 33.74    | 39.34    | 35.47    |
| 66 | Kidney      | Arm07             | Armenia    | Domestic pig | 27.88    | 31.46    | 31.05    |
| 67 | Kidney      | Ukr12/Zapo        | Ukraine    | Domestic pig | 27.47    | 30.26    | 28.92    |
| 68 | Kidney      | Ukr15/DP-Kieve 1  | Ukraine    | Domestic pig | 29.87    | 33.19    | 32.57    |
| 69 | Kidney      | LT14/1490         | Lithuania  | Wild boar    | 27.60    | 30.66    | 29.01    |
| 70 | Kidney      | Pol14/Krus        | Poland     | Wild boar    | 29.16    | 31.40    | 31.71    |
| 71 | Kidney      | Lv14/DP/Robez3    | Latvia     | Domestic pig | 32.02    | 34.69    | 33.87    |
| 72 | Kidney      | Est14/WB-Valga-1  | Estonia    | Wild boar    | 31.43    | 34.20    | 31.88    |
| 73 | Kidney      | Est15/WB-Tartu14  | Estonia    | Wild boar    | 32.56    | 36.96    | 33.38    |
| 74 | Kidney      | MOL16/DP-CERNO1   | Moldova    | Domestic pig | 33.14    | 36.19    | 33.42    |
| 75 | Kidney      | MOL16/DP-MOSA1    | Moldova    | Domestic pig | 31.86    | 35.92    | 34.91    |
| 76 | Kidney      | Moz64             | Mozambique | Domestic pig | 28.26    | 31.13    | 31.31    |
| 77 | Kidney      | MwLil 20/1        | Malawi     | Tick         | 31.95    | 34.72    | 34.3     |
| 78 | Kidney      | Ken11/KisP52      | Kenia      | Domestic pig | 32.78    | 31.94    | 31.02    |
| 79 | Kidney      | Ken06.Bus         | Kenia      | Domestic pig | 37.75    | 37.44    | 35.14    |
| 80 | Kidney      | Ken08Tk.2/1       | Kenia      | Tick         | 31.56    | 30.37    | 29.13    |
| 81 | Kidney      | UG10/Tk3.2        | Uganda     | Tick         | 38.26    | 37.66    | 37.63    |
| 82 | Kidney      | Eth13/1505        | Ethiopia   | Domestic pig | 29.57    | 33.90    | 26.61    |

|     |        |                   |            |              |          |                 |          |
|-----|--------|-------------------|------------|--------------|----------|-----------------|----------|
| 83  | Kidney | -                 | Spain      | Domestic pig | Negative | Negative        | Negative |
| 84  | Kidney | -                 | Spain      | Domestic pig | Negative | Negative        | Negative |
| 85  | Kidney | -                 | Spain      | Domestic pig | Negative | Negative        | Negative |
| 86  | Kidney | -                 | Spain      | Domestic pig | Negative | Negative        | Negative |
| 87  | Kidney | -                 | Spain      | Domestic pig | Negative | Negative        | Negative |
| 88  | Kidney | -                 | Spain      | Domestic pig | Negative | Negative        | Negative |
| 89  | Kidney | -                 | Spain      | Domestic pig | Negative | Negative        | Negative |
| 90  | Kidney | -                 | Spain      | Domestic pig | Negative | Negative        | Negative |
| 91  | Kidney | -                 | Spain      | Domestic pig | Negative | Negative        | Negative |
| 92  | Heart  | E70               | Spain      | Domestic pig | 28.00    | Neg-Inhib<br>IC | 30.1     |
| 93  | Heart  | BF07 OUAGA 2      | Burkina    | Domestic pig | 31.27    | 34.61           | 31.88    |
| 94  | Heart  | SS14/WB-Sassari1  | Italy      | Wild boar    | 30.46    | 32.81           | 31.68    |
| 95  | Heart  | SS14/DP-Cagliari1 | Italy      | Domestic pig | 34.98    | Negative        | 35.09    |
| 96  | Heart  | Arm07             | Armenia    | Domestic pig | 28.54    | 30.83           | 29.72    |
| 97  | Heart  | Ukr12/Zapo        | Ukraine    | Domestic pig | 29.22    | 29.9            | 29.98    |
| 98  | Heart  | Ukr15/DP-Kieve 1  | Ukraine    | Domestic pig | 30.1     | 32.44           | 30.45    |
| 99  | Heart  | LT14/1490         | Lithuania  | Wild boar    | 28.13    | 30.11           | 29.37    |
| 100 | Heart  | Pol14/Krus        | Poland     | Wild boar    | 28.79    | 31.51           | 30.77    |
| 101 | Heart  | Lv14/DP/Robez3    | Latvia     | Domestic pig | 31.88    | 34.57           | 33.04    |
| 102 | Heart  | Est14/WB-Valga-1  | Estonia    | Wild boar    | 31.66    | 34.16           | 32.87    |
| 103 | Heart  | Est15/WB-Tartu14  | Estonia    | Wild boar    | 33.20    | 35.12           | 35.5     |
| 104 | Heart  | MOL16/DP-CERNO1   | Moldova    | Domestic pig | 32.27    | 41.52           | 38.2     |
| 105 | Heart  | MOL16/DP-MOSA1    | Moldova    | Domestic pig | 31.84    | 35.08           | 34.53    |
| 106 | Heart  | Moz64             | Mozambique | Domestic pig | 28.58    | 31.28           | 31       |
| 107 | Heart  | MwLil 20/1        | Malawi     | Tick         | 32.36    | 34.12           | 33.01    |
| 108 | Heart  | Ken11/KisP52      | Kenia      | Domestic pig | 34.2     | 31.48           | 29.8     |
| 109 | Heart  | Ken06.Bus         | Kenia      | Domestic pig | 36.18    | 34.16           | 33.72    |
| 110 | Heart  | Ken08Tk.2/1       | Kenia      | Tick         | 32.49    | 30.22           | 28.41    |

|     |       |                   |            |              |          |                 |          |
|-----|-------|-------------------|------------|--------------|----------|-----------------|----------|
| 111 | Heart | UG10/Tk3.2        | Uganda     | Tick         | 39.51    | 37.28           | 34.37    |
| 112 | Heart | Eth13/1505        | Ethiopia   | Domestic pig | 30.37    | 33.77           | 32.85    |
| 113 | Heart | -                 | Spain      | Domestic pig | Negative | Negative        | Negative |
| 114 | Heart | -                 | Spain      | Domestic pig | Negative | Negative        | Negative |
| 115 | Heart | -                 | Spain      | Domestic pig | Negative | Negative        | Negative |
| 116 | Heart | -                 | Spain      | Domestic pig | Negative | Negative        | Negative |
| 117 | Heart | -                 | Spain      | Domestic pig | Negative | Negative        | Negative |
| 118 | Heart | -                 | Spain      | Domestic pig | Negative | Negative        | Negative |
| 119 | Heart | -                 | Spain      | Domestic pig | Negative | Negative        | Negative |
| 120 | Heart | -                 | Spain      | Domestic pig | Negative | Negative        | Negative |
| 121 | Heart | -                 | Spain      | Domestic pig | Negative | Negative        | Negative |
| 122 | Liver | E70               | Spain      | Domestic pig | 28.00    | Neg-Inhib<br>IC | 30.1     |
| 123 | Liver | BF07 OUAGA 2      | Burkina    | Domestic pig | 31.27    | 34.61           | 31.88    |
| 124 | Liver | SS14/WB-Sassari1  | Italy      | Wild boar    | 30.46    | 32.81           | 31.68    |
| 125 | Liver | SS14/DP-Cagliari1 | Italy      | Domestic pig | 34.98    | Negative        | 35.09    |
| 126 | Liver | Arm07             | Armenia    | Domestic pig | 28.54    | 30.83           | 29.72    |
| 127 | Liver | Ukr12/Zapo        | Ukraine    | Domestic pig | 29.22    | 29.9            | 29.98    |
| 128 | Liver | Ukr15/DP-Kieve 1  | Ukraine    | Domestic pig | 30.1     | 32.44           | 30.45    |
| 129 | Liver | LT14/1490         | Lithuania  | Wild boar    | 28.13    | 30.11           | 29.37    |
| 130 | Liver | Pol14/Krus        | Poland     | Wild boar    | 28.79    | 31.51           | 30.77    |
| 131 | Liver | Lv14/DP/Robez3    | Latvia     | Domestic pig | 31.88    | 34.57           | 33.04    |
| 132 | Liver | Est14/WB-Valga-1  | Estonia    | Wild boar    | 31.66    | 34.16           | 32.87    |
| 133 | Liver | Est15/WB-Tartu14  | Estonia    | Wild boar    | 33.20    | 35.12           | 35.5     |
| 134 | Liver | MOL16/DP-CERNO1   | Moldova    | Domestic pig | 32.27    | 41.52           | 38.2     |
| 135 | Liver | MOL16/DP-MOSA1    | Moldova    | Domestic pig | 31.84    | 35.08           | 34.53    |
| 136 | Liver | Moz64             | Mozambique | Domestic pig | 28.58    | 31.28           | 31       |
| 137 | Liver | MwLil 20/1        | Malawi     | Tick         | 32.36    | 34.12           | 33.01    |
| 138 | Liver | Ken11/KisP52      | Kenia      | Domestic pig | 34.2     | 31.48           | 29.8     |

|     |        |                   |            |              |          |          |          |
|-----|--------|-------------------|------------|--------------|----------|----------|----------|
| 139 | Liver  | Ken06.Bus         | Kenia      | Domestic pig | 36.18    | 34.16    | 33.72    |
| 140 | Liver  | Ken08Tk.2/1       | Kenia      | Tick         | 32.49    | 30.22    | 28.41    |
| 141 | Liver  | UG10/Tk3.2        | Uganda     | Tick         | 39.51    | 37.28    | 34.37    |
| 142 | Liver  | Eth13/1505        | Ethiopia   | Domestic pig | 30.37    | 33.77    | 32.85    |
| 143 | Liver  | -                 | Spain      | Domestic pig | Negative | Negative | Negative |
| 144 | Liver  | -                 | Spain      | Domestic pig | Negative | Negative | Negative |
| 145 | Liver  | -                 | Spain      | Domestic pig | Negative | Negative | Negative |
| 146 | Liver  | -                 | Spain      | Domestic pig | Negative | Negative | Negative |
| 147 | Liver  | -                 | Spain      | Domestic pig | Negative | Negative | Negative |
| 148 | Liver  | -                 | Spain      | Domestic pig | Negative | Negative | Negative |
| 149 | Liver  | -                 | Spain      | Domestic pig | Negative | Negative | Negative |
| 150 | Liver  | -                 | Spain      | Domestic pig | Negative | Negative | Negative |
| 151 | Liver  | -                 | Spain      | Domestic pig | Negative | Negative | Negative |
| 152 | Tonsil | E70               | Spain      | Domestic pig | 28.51    | 30.73    | 27.47    |
| 153 | Tonsil | BF07 OUAGA 2      | Burkina    | Domestic pig | 30.91    | 35.77    | 35.69    |
| 154 | Tonsil | SS14/WB-Sassari1  | Italy      | Wild boar    | 29.86    | 34.12    | 31.16    |
| 155 | Tonsil | SS14/DP-Cagliari1 | Italy      | Domestic pig | 32.64    | 36.12    | 34.24    |
| 156 | Tonsil | Arm07             | Armenia    | Domestic pig | 28.14    | 31.81    | 30.26    |
| 157 | Tonsil | Ukr12/Zapo        | Ukraine    | Domestic pig | 27.47    | 30.42    | 29.66    |
| 158 | Tonsil | Ukr15/DP-Kieve 1  | Ukraine    | Domestic pig | 29.98    | 33.3     | 32.2     |
| 159 | Tonsil | LT14/1490         | Lithuania  | Wild boar    | 28.21    | 31.2     | 29.67    |
| 160 | Tonsil | Pol14/Krus        | Poland     | Wild boar    | 28.70    | 32.16    | 31.56    |
| 161 | Tonsil | Lv14/DP/Robez3    | Latvia     | Domestic pig | 31.71    | 35.54    | 35.3     |
| 162 | Tonsil | Est14/WB-Valga-1  | Estonia    | Wild boar    | 31.87    | 35.17    | 32.61    |
| 163 | Tonsil | Est15/WB-Tartu14  | Estonia    | Wild boar    | 32.64    | 36.76    | 36.54    |
| 164 | Tonsil | MOL16/DP-CERNO1   | Moldova    | Domestic pig | 33.31    | 38.51    | 37.38    |
| 165 | Tonsil | MOL16/DP-MOSA1    | Moldova    | Domestic pig | 31.20    | 35.46    | 35       |
| 166 | Tonsil | Moz64             | Mozambique | Domestic pig | 28.11    | 31.27    | 31.02    |
| 167 | Tonsil | MwLil 20/1        | Malawi     | Tick         | 31.82    | 34.93    | 33.86    |

|     |        |              |          |              |          |          |          |
|-----|--------|--------------|----------|--------------|----------|----------|----------|
| 168 | Tonsil | Ken11/KisP52 | Kenia    | Domestic pig | 33.10    | 32.36    | 30.87    |
| 169 | Tonsil | Ken06.Bus    | Kenia    | Domestic pig | 36.68    | 37.31    | 35.27    |
| 170 | Tonsil | Ken08Tk.2/1  | Kenia    | Tick         | 32.24    | 31.15    | 29.14    |
| 171 | Tonsil | UG10/Tk3.2   | Uganda   | Tick         | 37.79    | Negative | 35.27    |
| 172 | Tonsil | Eth13/1505   | Ethiopia | Domestic pig | 30.56    | 34.39    | 36.72    |
| 173 | Tonsil | -            | Spain    | Domestic pig | Negative | Negative | Negative |
| 174 | Tonsil | -            | Spain    | Domestic pig | Negative | Negative | Negative |
| 175 | Tonsil | -            | Spain    | Domestic pig | Negative | Negative | Negative |
| 176 | Tonsil | -            | Spain    | Domestic pig | Negative | Negative | Negative |
| 177 | Tonsil | -            | Spain    | Domestic pig | Negative | Negative | Negative |
| 178 | Tonsil | -            | Spain    | Domestic pig | Negative | Negative | Negative |
| 179 | Tonsil | -            | Spain    | Domestic pig | Negative | Negative | Negative |
| 180 | Tonsil | -            | Spain    | Domestic pig | Negative | Negative | Negative |
| 181 | Tonsil | -            | Spain    | Domestic pig | Negative | Negative | Negative |

---
